# Supplementary material
Source: PubMed Central journal article supplement (PMC1201329)
Supplement: nar_33_16_5026__9.pdf [file nar_33_16_5026__9.pdf]

# Fig 2A

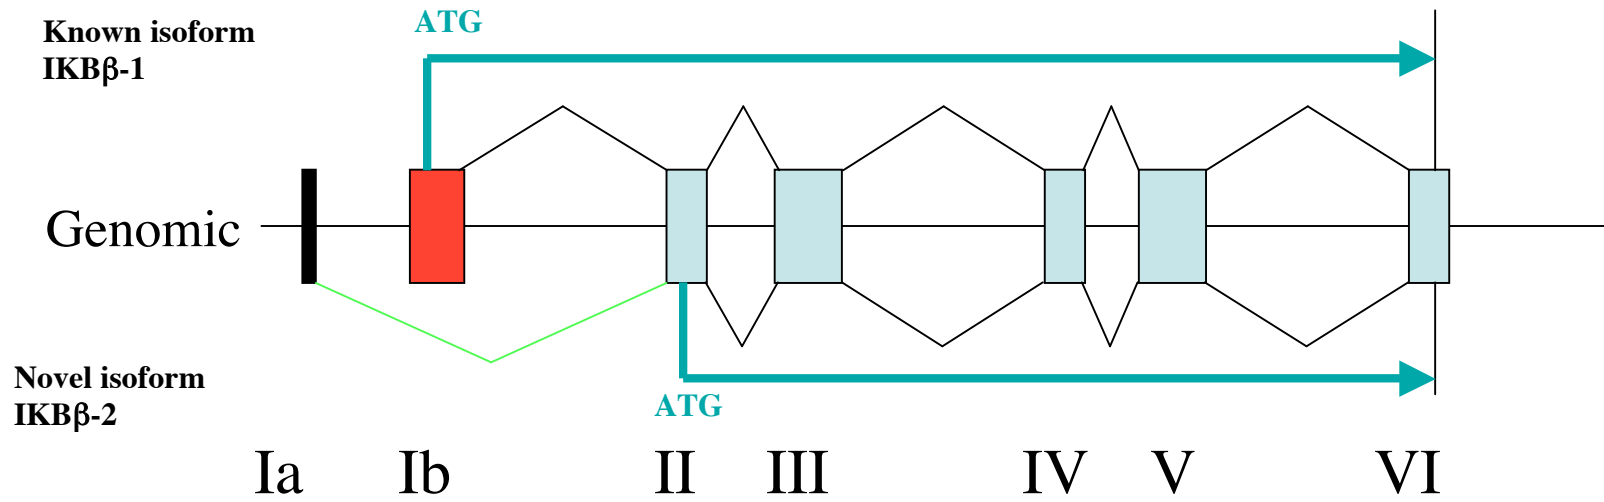

# Fig 2B

```

      *      20      *      40      *      60      *
1 : MAGVACLGKAADADEWCD SGLGSLGPDAAAPGGPGLGAELGPGLSWAPLVFGYVTEDEGDTALHLAVIHQHE : 71
2 : ----- : -

      ANK 1                      ANK 2
      _____                _____
      80      *      100      *      120      *      140
1 : PFLDFLLGFSAGTEYMDLQNDLGQTALHLAAILGETSTVEKLYAAGAGLCVAERRGHTALHLACRVGAHAC : 142
2 : -----MDLQNDLGQTALHLAAILGETSTVEKLYAAGAGLCVAERRGHTALHLACRVGAHAC : 56

      ANK 3
      _____                _____
      *      160      *      180      *      200      *
1 : ARALLQPRRRPREAPDTYLAQGPDRTPDTNHTPVALYPDSDLEKEEEEESEEDWKLQLEAENYEGHTPLHV : 213
2 : ARALLQPRRRPREAPDTYLAQGPDRTPDTNHTPVALYPDSDLEKEEEEESEEDWKLQLEAENYEGHTPLHV : 127

      ANK 4                      ANK 5
      _____                _____
      220      *      240      *      260      *      280
1 : AVIHKDVEMVRLLRDAGADLDKPEPTCGRSPLHLAVEAQAADVLELLLRAGANPAARMYGGRTPLGSAMLR : 284
2 : AVIHKDVEMVRLLRDAGADLDKPEPTCGRSPLHLAVEAQAADVLELLLRAGANPAARMYGGRTPLGSAMLR : 198

      ANK 6
      _____                _____
      *      300      *      320      *      340      *
1 : PNPILARLLRAHGAPEPEGEDEKSGPCSSSSDSDSGDEGDEYDDIVVHSSRSQTRLPPPTPASKPLPDDPRP : 355
2 : PNPILARLLRAHGAPEPEGEDEKSGPCSSSSDSDSGDEGDEYDDIVVHSSRSQTRLPPPTPASKPLPDDPRP : 269

1 : V : 356
2 : V : 270

```
