# Supplementary material
Source: PubMed Central journal article supplement (PMC1201329)

# Fig 1A

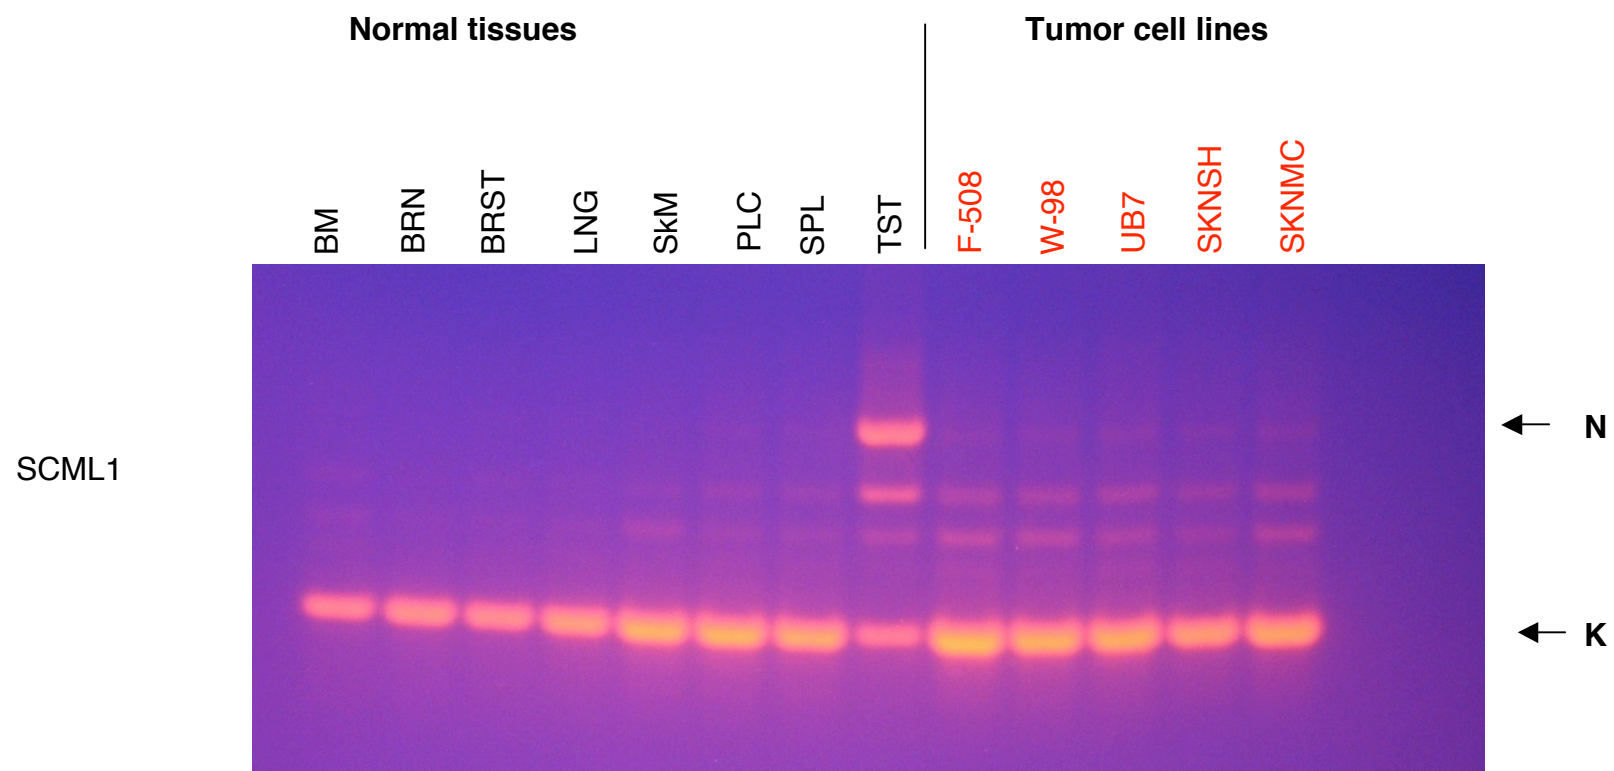

Supplement: nar_33_16_5026__1.pdf [file nar_33_16_5026__1.pdf]

**Fig 1B**

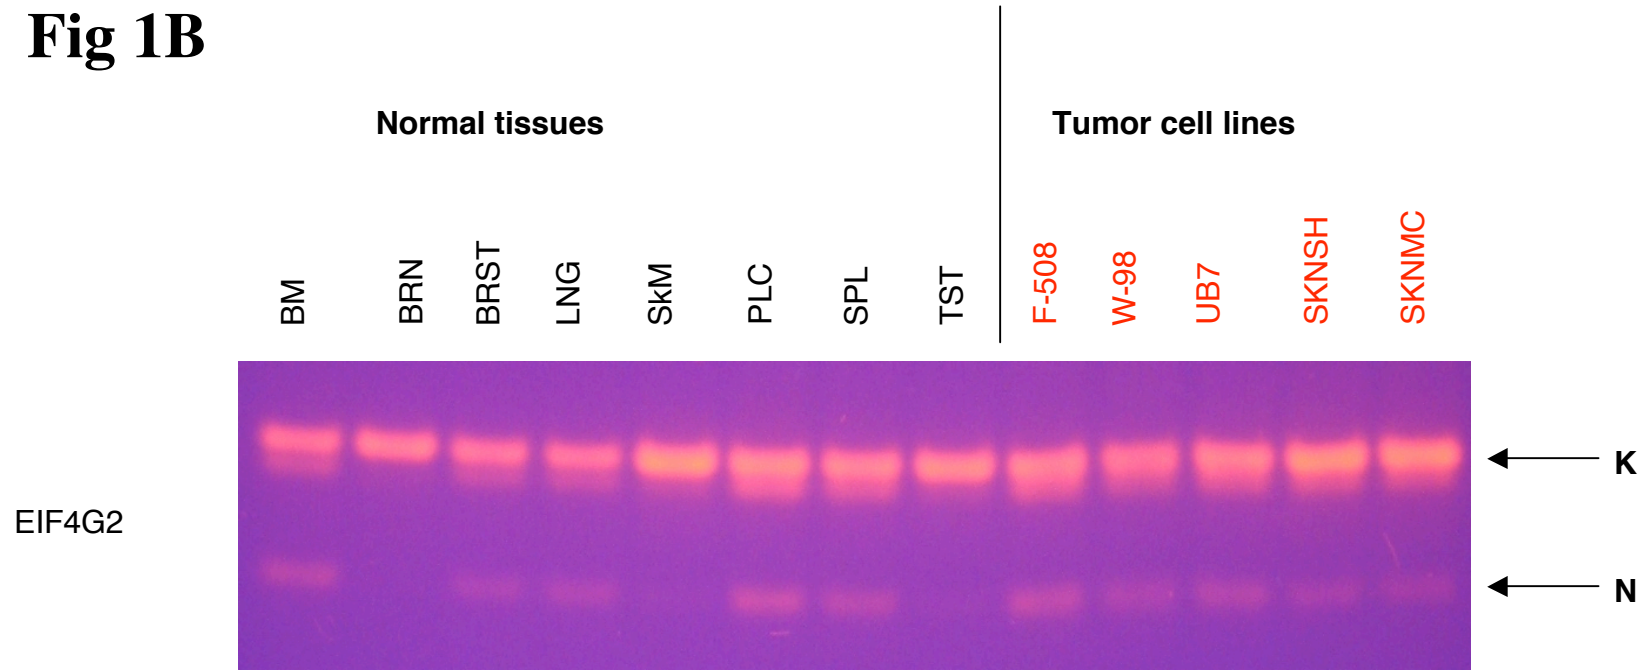

Supplement: nar_33_16_5026__2.pdf [file nar_33_16_5026__2.pdf]

# Fig 1C

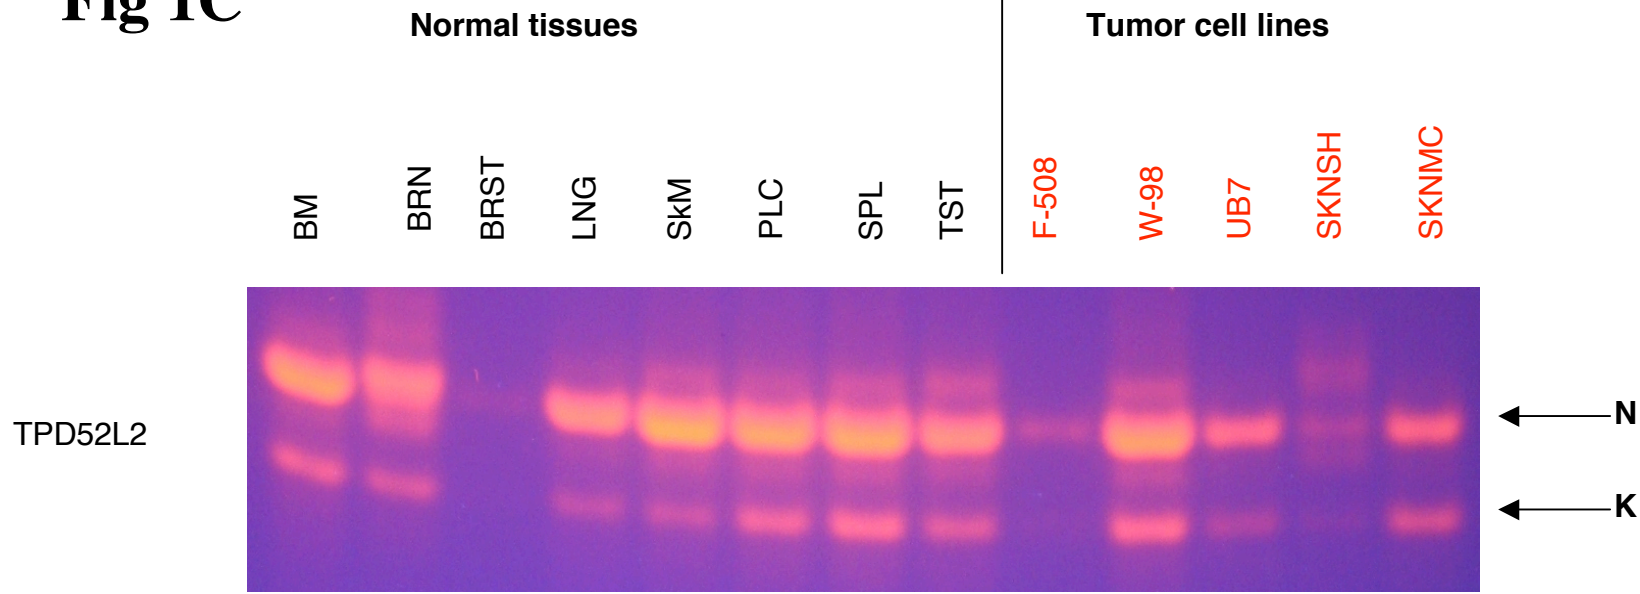

Supplement: nar_33_16_5026__3.pdf [file nar_33_16_5026__3.pdf]

# Fig 1D

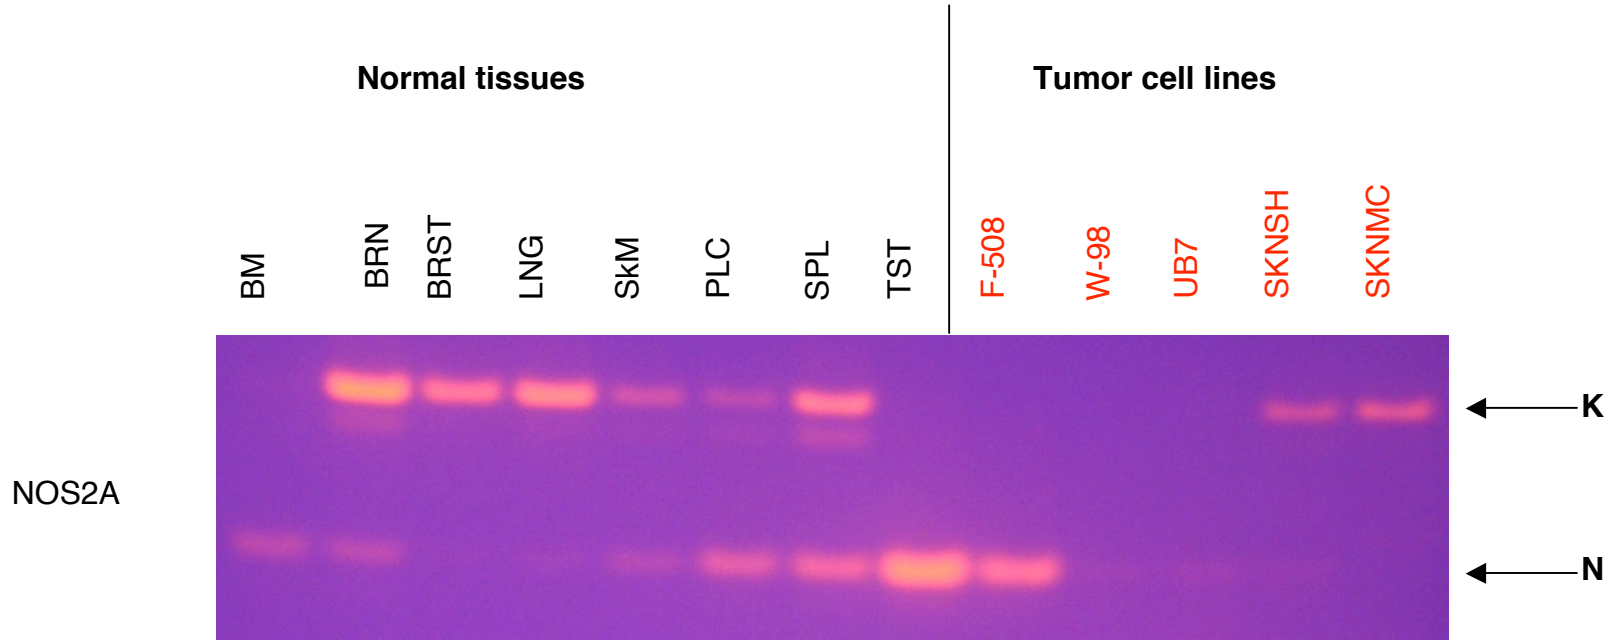

Supplement: nar_33_16_5026__4.pdf [file nar_33_16_5026__4.pdf]

**Fig 1E**

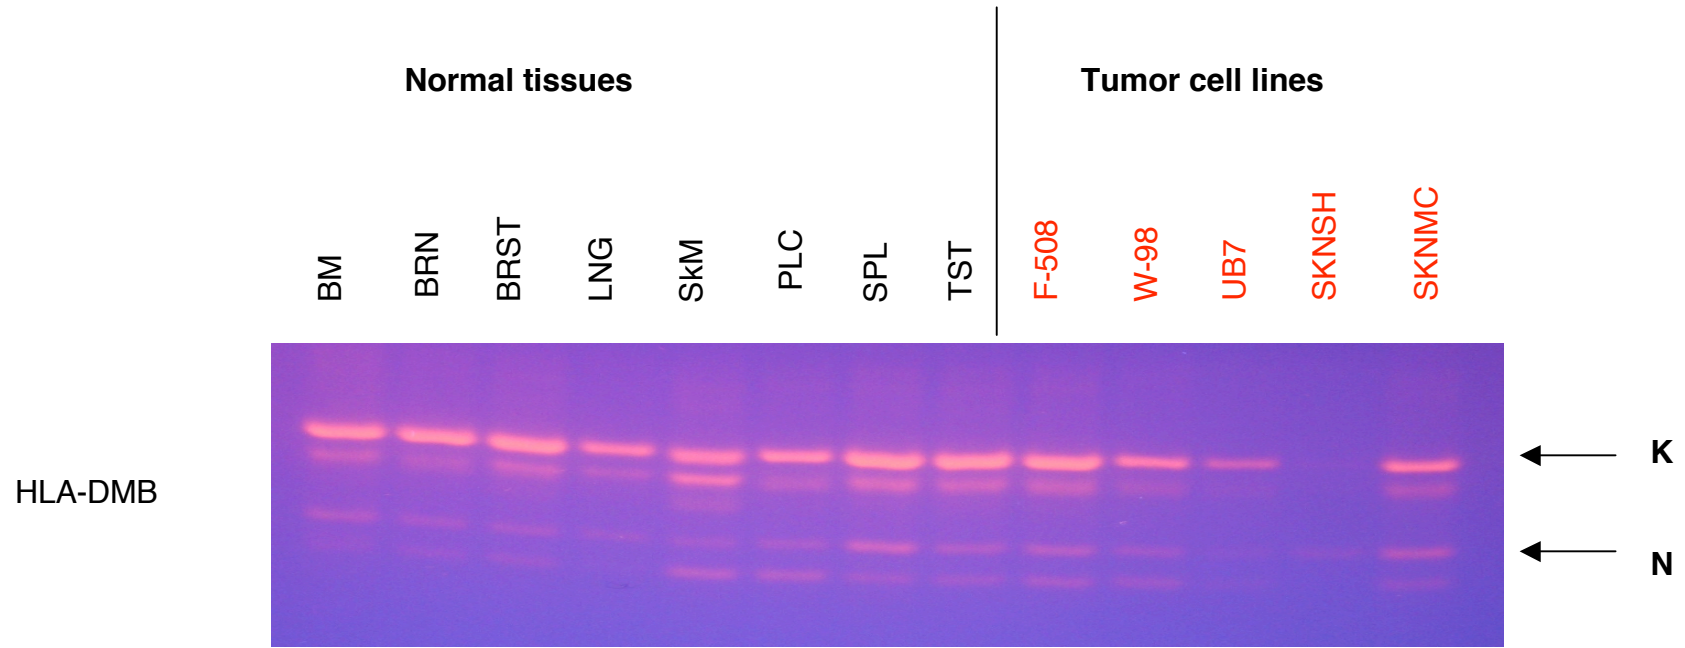

Supplement: nar_33_16_5026__5.pdf [file nar_33_16_5026__5.pdf]

**Fig 1F**

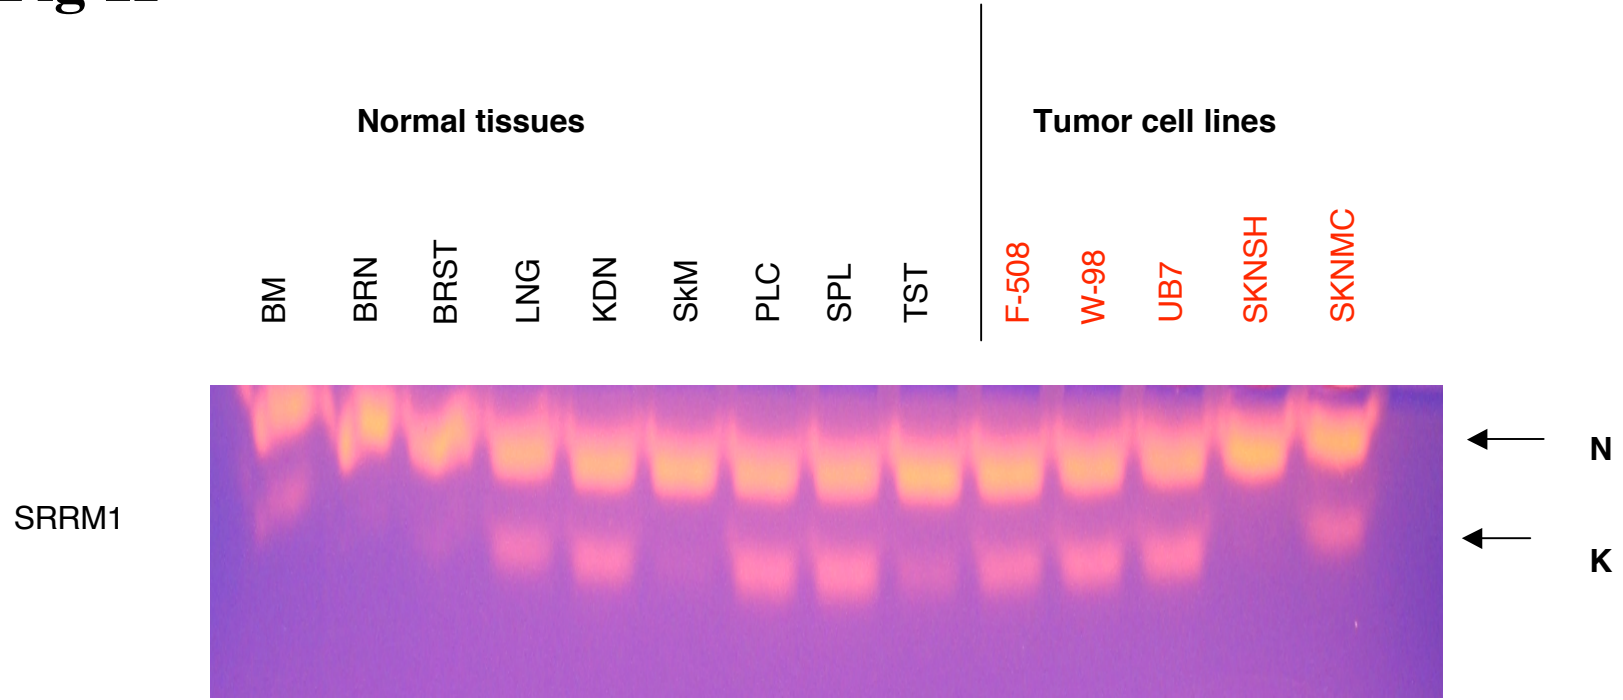

Supplement: nar_33_16_5026__6.pdf [file nar_33_16_5026__6.pdf]

**Fig 1G**

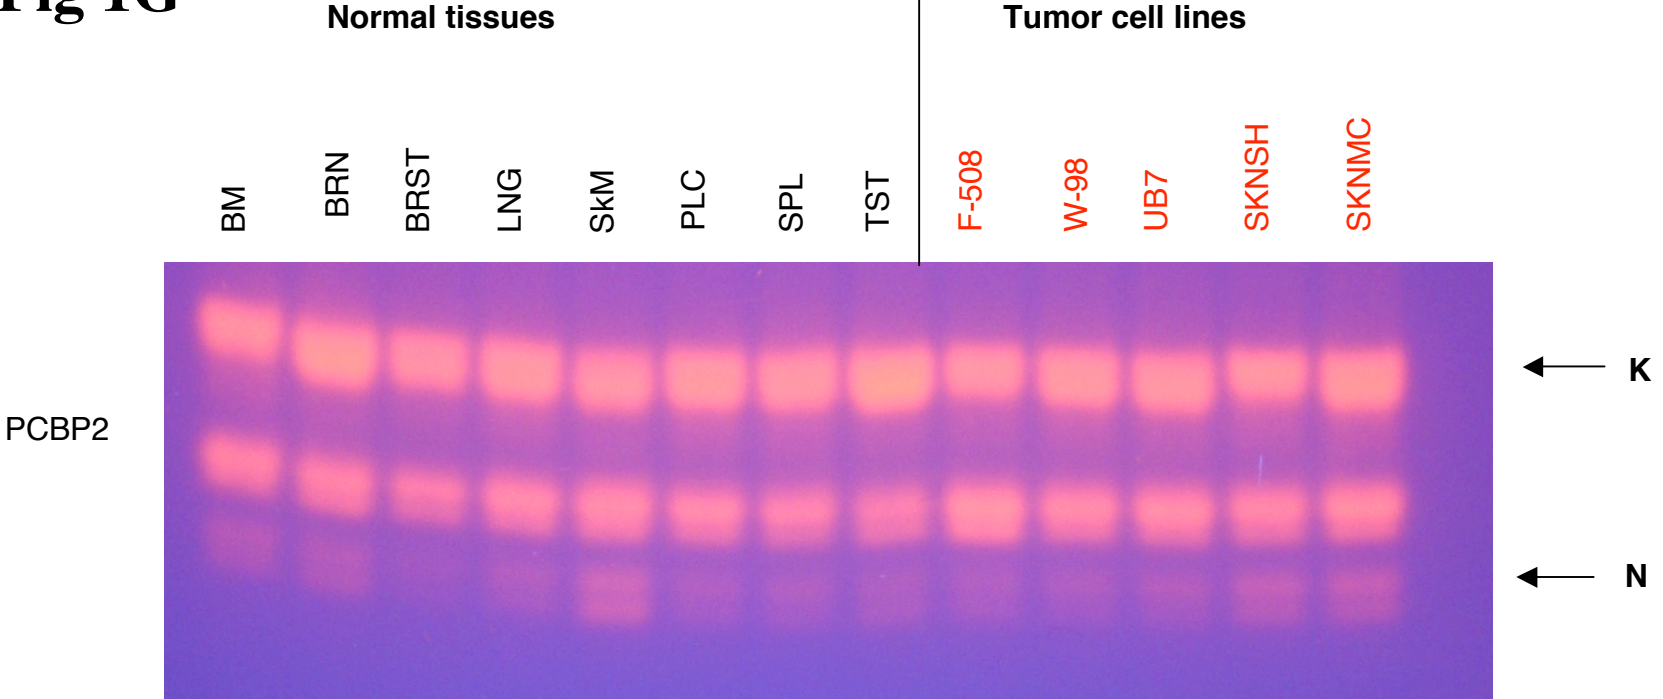

Supplement: nar_33_16_5026__7.pdf [file nar_33_16_5026__7.pdf]

**Fig 1H**

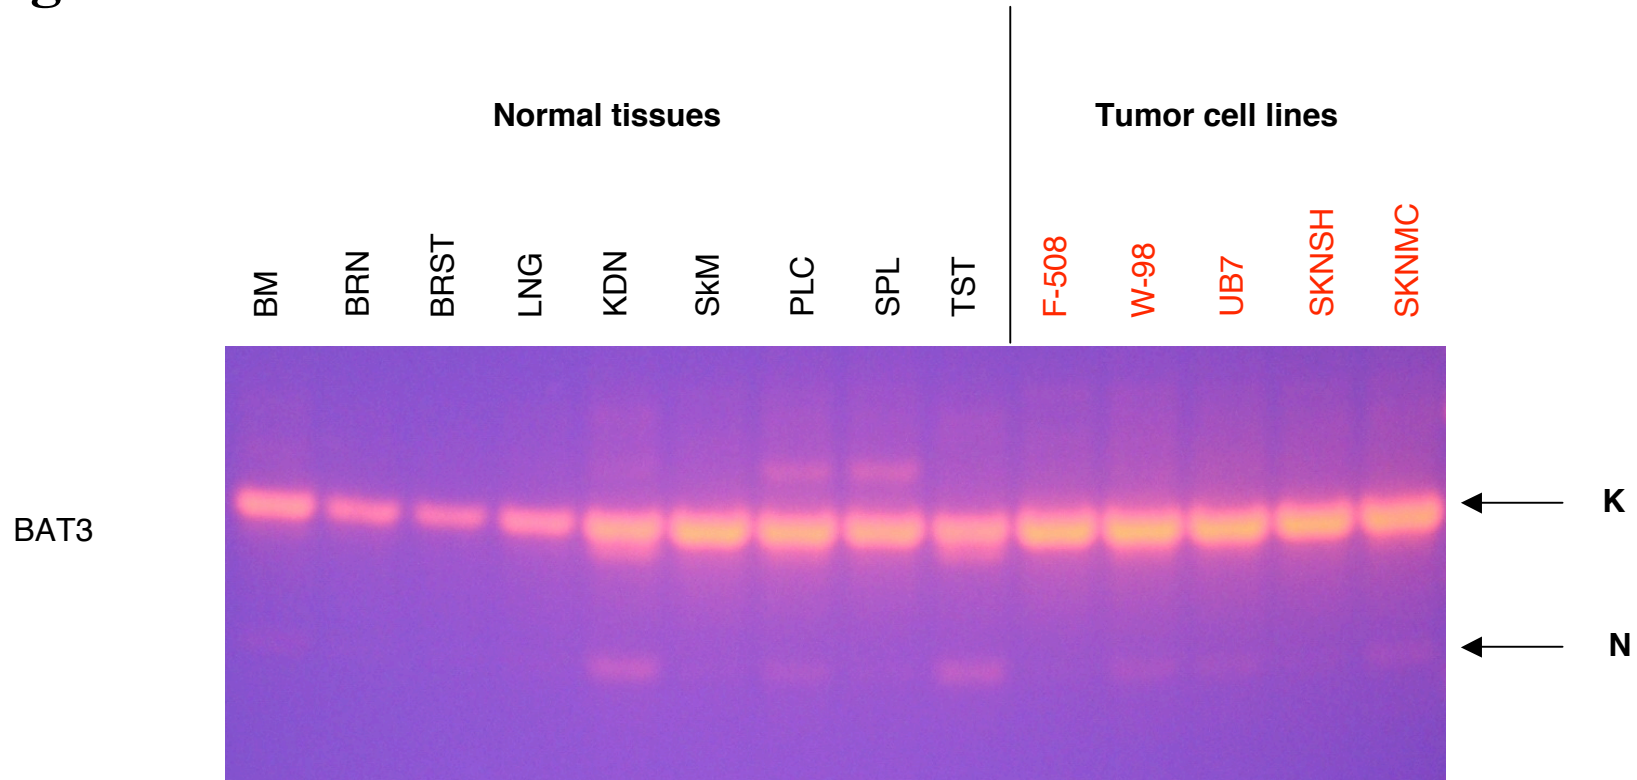

Supplement: nar_33_16_5026__8.pdf [file nar_33_16_5026__8.pdf]
